# Supplementary material
Source: PubMed Central journal article supplement (PMC5272868)
Supplement: NIHMS833223-supplement-2.pdf [file NIHMS833223-supplement-2.pdf]

**a**

|       | AM/PM                | RL                   | AL                   | LM                   | LI   |
|-------|----------------------|----------------------|----------------------|----------------------|------|
| AM/PM |                      | 0.80                 | 0.85                 | 0.62                 | 0.59 |
| RL    | $7 \times 10^{-6}$   |                      | 0.81                 | 0.68                 | 0.67 |
| AL    | $4.2 \times 10^{-7}$ | $6.1 \times 10^{-6}$ |                      | 0.72                 | 0.73 |
| LM    | $1.9 \times 10^{-3}$ | $5.3 \times 10^{-4}$ | $1.7 \times 10^{-4}$ |                      | 0.76 |
| LI    | $4.1 \times 10^{-3}$ | $7.2 \times 10^{-4}$ | $1.3 \times 10^{-4}$ | $3.8 \times 10^{-5}$ |      |

P value

Correlation

**b**

|       | AM/PM                | RL                   | AL                   | LM                   | LI   |
|-------|----------------------|----------------------|----------------------|----------------------|------|
| AM/PM |                      | 0.67                 | 0.66                 | 0.38                 | 0.44 |
| RL    | $6.6 \times 10^{-7}$ |                      | 0.74                 | 0.55                 | 0.37 |
| AL    | $1.2 \times 10^{-6}$ | $1.3 \times 10^{-8}$ |                      | 0.59                 | 0.38 |
| LM    | $1.2 \times 10^{-2}$ | $1.1 \times 10^{-4}$ | $2.4 \times 10^{-5}$ |                      | 0.60 |
| LI    | $3 \times 10^{-3}$   | $1.5 \times 10^{-2}$ | $1.2 \times 10^{-2}$ | $1.6 \times 10^{-5}$ |      |

P value

Correlation

Supplementary Table 1

**Correlation among HVA responses to gratings and kinematograms**

Correlation values (Pearson's R) and P-values for the matrices in Figure 1 are shown.
